# Supplementary material
Source: PubMed Central journal article supplement (PMC6664195)
Supplement: supp_RA119.007983_143699_3_supp_332208_prk7fm.pdf [file supp_RA119.007983_143699_3_supp_332208_prk7fm.pdf]

## Supplementary Information for

### **Proline mediates mitochondrial metabolic communication between RPE and retina**

Michelle Yam<sup>1,2&</sup>, Abbi L Engel<sup>3&</sup>, Yekai Wang<sup>1,2</sup>, Siyan Zhu<sup>1,2</sup>, Allison Hauer<sup>1,2</sup>, Rui Zhang<sup>1,4</sup>, Daniel Lohner<sup>1,2</sup>, Jiancheng Huang<sup>1,5,6</sup>, Marlee Dinterman<sup>1,2</sup>, Chen Zhao<sup>5</sup>, Jennifer R. Chao<sup>3\*</sup> and Jianhai Du<sup>1,2\*</sup>

<sup>1</sup>Department of Ophthalmology, West Virginia University, Morgantown, WV 26506

<sup>2</sup>Department of Biochemistry, West Virginia University, Morgantown, WV 26506

<sup>3</sup>Department of Ophthalmology, University of Washington, Seattle, WA 98109

<sup>4</sup>Save Sight Institute, University of Sydney, 8 Macquarie Street, Sydney, NSW 2000, Australia

<sup>5</sup> Eye Institute, Institute, Eye & ENT Hospital, Shanghai Medical College, Fudan University, Shanghai 200031, China

<sup>6</sup>Department of Ophthalmology, The First Affiliated Hospital of Nanjing Medical University, State Key Laboratory of Reproductive Medicine, Nanjing, China

Corresponding author: Jianhai Du  
Email: [jianhai.du@wvumedicine.org](mailto:jianhai.du@wvumedicine.org)

#### **This PDF file includes:**

Supplementary text  
Figs. S1 to S10  
Tables S1 to S3

## **Supplemental Methods**

### **O<sub>2</sub> consumption**

Human RPE cells were plated in Seahorse XF analyzer microplates (Agilent Seahorse Biosciences) and grown in RPE media. After maturation, RPE cells were switched to assay media (minimal DMEM (Agilent Seahorse Biosciences) containing 5 mM glucose, 5 mM glucose with 2 mM proline or 5 mM glucose with 2 mM glutamine and 1 mM pyruvate) before measurement. Oxygen consumption rates (OCR) were obtained and analyzed using the XF-24 Extracellular Flux Analyzer (Agilent Seahorse Biosciences) following injections of mitochondrial inhibitors from the XF Cell Mito Stress Kit at the following concentrations 1  $\mu$ M oligomycin, 500 nM FCCP, and 2  $\mu$ M Rotenone and 2  $\mu$ M Antimycin A.

### **Cryosection immunohistochemistry (IHC)**

After brief fixation of eyes in 4% PFA for 10 min, the cornea was removed and the eye cups were further fixed in 4% PFA for 50 min. After being washed three times in PBS (5 min each), the fixed eye cups were incubated first in 20% sucrose in PBS overnight at 4 °C and then in 1:1 20% sucrose in PBS and optimal cutting temperature compound (OCT) for 1h, at 30 min the lens was removed. Finally, eye cups were embedded in OCT and frozen in a dry ice/100% ethanol bath. For cryosection IHC, frozen sections were blocked in 10% normal goat serum and incubated with primary antibodies overnight, which was detected through secondary antibody incubation at 1h using Alexa-Fluor 488 or -594 conjugated secondary antibodies (1:1000, Invitrogen).

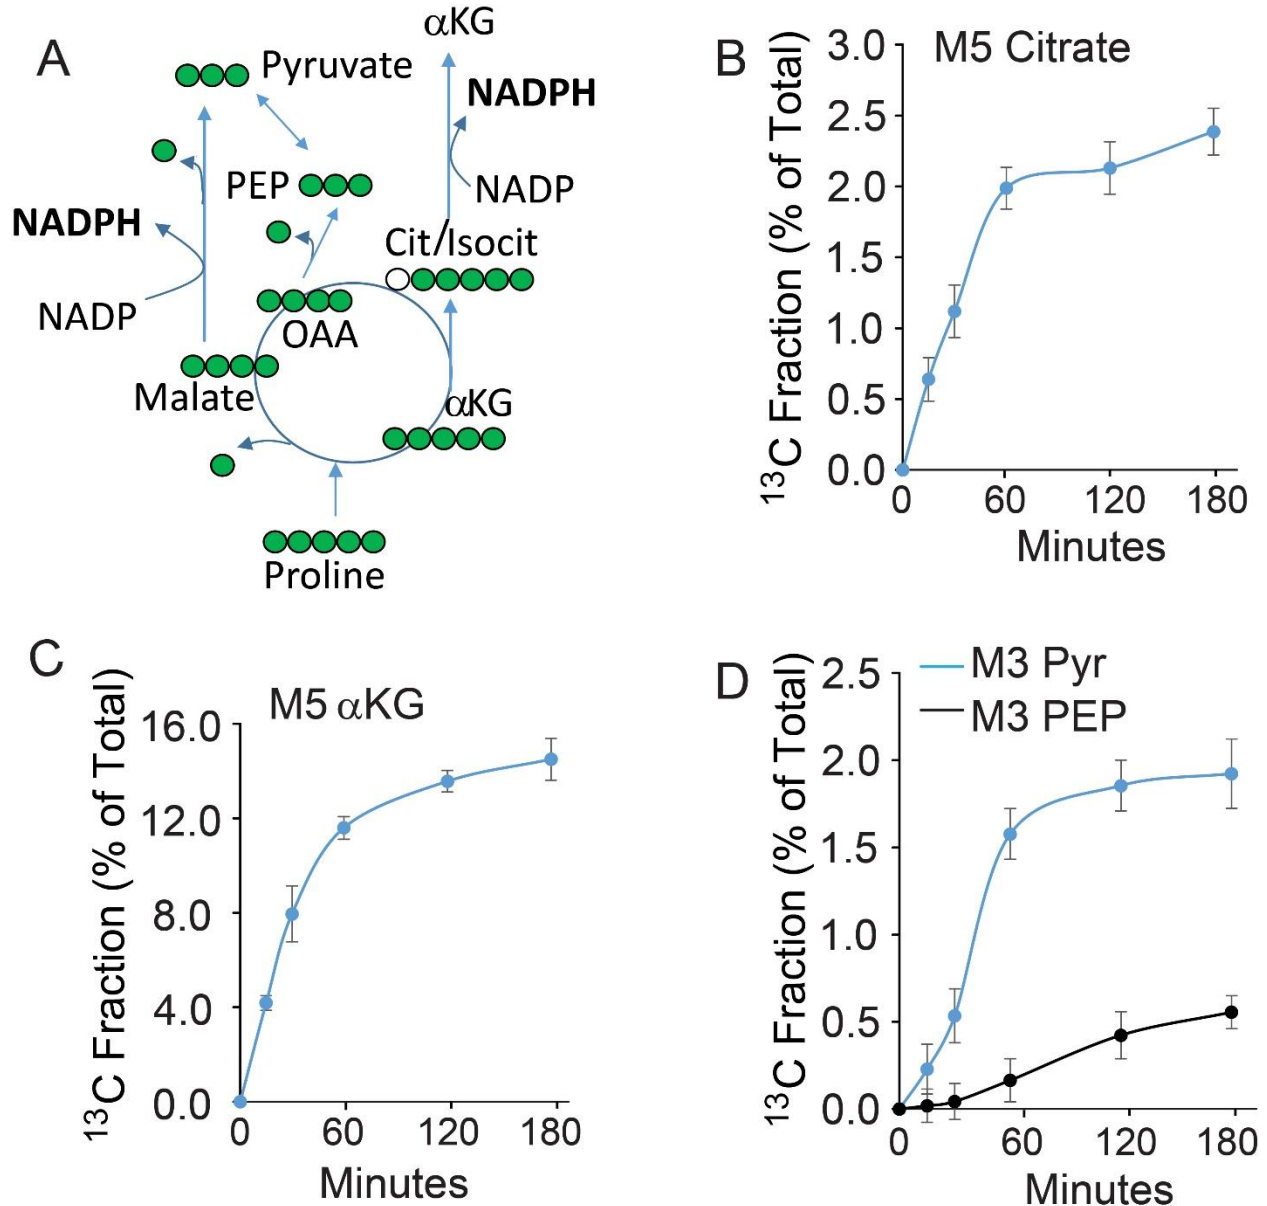

**Fig S1. Proline increases reductive carboxylation and flux to produce pyruvate.** (A) Schematic for the pattern of labeling by  $^{13}\text{C}$  proline. Five carbon labeled proline (M5) can generate M5 citrate through reductive carboxylation and M3 pyruvate through malic enzyme. (B-D) Isolated mouse RPE/choroid was incubated with 5 mM glucose and 1 mM  $^{13}\text{C}$  proline for different time and metabolites were analyzed by GC MS. Enrichment is the percent of labeled carbon of total isotopologues. N=4.

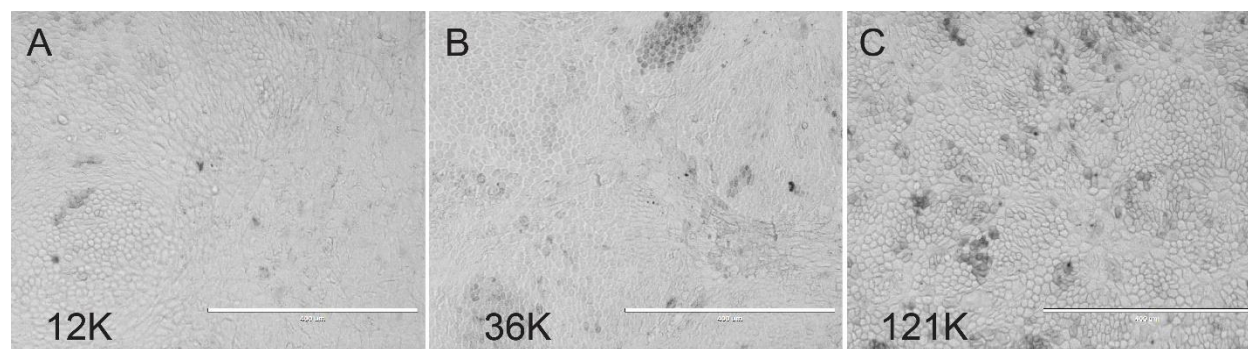

**Fig S2. RPE maturation with different plating densities.** (A-C) RPE cells were plated at 12 thousands (K), 36K and 121K cells/per well in a 12-well plate and grown for a week. Scale bar = 400  $\mu$ M.

**Table S1. List of detected metabolites by LC MS/MS and GC MS.**

| Metabolite                   | Precursor (Da) | Product (Da) | Declustering potential | Collision energy | HMDB        | Platform | Polarity |
|------------------------------|----------------|--------------|------------------------|------------------|-------------|----------|----------|
| NAD                          | 664            | 136          | 27                     | 48               | HMDB00902   | LCMS     | +        |
| 4-hydroxyproline             | 132.1          | 86           | 60                     | 17               | HMDB00725   | LCMS     | +        |
| Proline                      | 116.1          | 70.1         | 70                     | 44               | HMDB00162   | LCMS     | +        |
| Arginine                     | 175.1          | 70.1         | 45                     | 33               | HMDB00517   | LCMS     | +        |
| Glutamine                    | 147.1          | 84.1         | 45                     | 23               | HMDB00641   | LCMS     | +        |
| ATP                          | 507.9          | 136.1        | 14                     | 60               | HMDB00538   | LCMS     | +        |
| Nicotinamide                 | 123            | 80           | 111                    | 20               | HMDB01406   | LCMS     | +        |
| N1-Methylnicotinamide        | 137            | 78           | 110                    | 37               | HMDB00699   | LCMS     | +        |
| Nicotinic Acid 13C1 Positive | 125            | 80           | 95                     | 30               | N/A         | LCMS     | +        |
| UDP Glucose                  | 611            | 449          | 40                     | 29               | HMDB00286   | LCMS     | +        |
| Choline                      | 104.1          | 60.1         | 95                     | 37               | HMDB00097   | LCMS     | +        |
| O Acetyl L Carnitine         | 204.1          | 85           | 71                     | 30               | HMDB00201   | LCMS     | +        |
| FAD                          | 786.1          | 136.1        | 52                     | 43               | HMDB01248   | LCMS     | +        |
| Riboflavin                   | 377.1          | 243.1        | 14                     | 29               | HMDB00244   | LCMS     | +        |
| Carnosine                    | 227.1          | 110.1        | 157                    | 32               | HMDB00033   | LCMS     | +        |
| Ophthalmic Acid              | 290.1          | 58           | 139                    | 56               | HMDB0005765 | LCMS     | +        |
| coA                          | 768.1          | 261          | 34                     | 47               | HMDB01423   | LCMS     | +        |
| Acetyl coA                   | 810.1          | 303.1        | 116                    | 46               | HMDB0001206 | LCMS     | +        |

*Proline metabolism in RPE and retina*

|                      |        |       |      |     |             |      |   |
|----------------------|--------|-------|------|-----|-------------|------|---|
| Palmitoyl Coenzyme A | 1006.3 | 499.5 | 45   | 53  | HMDB0001338 | LCMS | + |
| Ornithine            | 133    | 70    | 47   | 23  | HMDB0000214 | LCMS | + |
| Adenosine            | 268.1  | 136   | 95   | 38  | HMDB000050  | LCMS | + |
| 1Methyladenosine     | 282.1  | 150.1 | 48   | 35  | HMDB03331   | LCMS | + |
| Creatine             | 132.1  | 90    | 170  | 17  | HMDB000064  | LCMS | + |
| Uridine              | 245    | 113   | 23   | 51  | HMDB000296  | LCMS | + |
| Cytidine             | 244    | 112.1 | 50   | 30  | HMDB000089  | LCMS | + |
| GDP                  | 444    | 152   | 65   | 26  | HMDB01201   | LCMS | + |
| Betaine              | 118.1  | 58    | 166  | 56  | HMDB000043  | LCMS | + |
| Homoserine           | 120.1  | 74    | 37   | 16  | HMDB000719  | LCMS | + |
| Tryptophan           | 205    | 146   | 75   | 35  | HMDB000929  | LCMS | + |
| Aspartic Acid        | 134.1  | 74    | 50   | 20  | HMDB000191  | LCMS | + |
| Cytosine             | 112    | 95    | 97   | 23  | HMDB0000630 | LCMS | + |
| 3 Aminoisobutyrate   | 104.1  | 58    | 55   | 38  | HMDB03911   | LCMS | + |
| Thiamine             | 265    | 122.1 | 67   | 40  | HMDB000235  | LCMS | + |
| Alanine              | 90     | 44    | 50   | 20  | HMDB0000161 | LCMS | + |
| Glycine              | 76     | 30.2  | 30   | 16  | HMDB0000123 | LCMS | + |
| Serine               | 106    | 60    | 40   | 22  | HMDB0000187 | LCMS | + |
| Valine               | 118.1  | 72    | 60   | 14  | HMDB0000883 | LCMS | + |
| Threonine            | 120.1  | 102   | 50   | 10  | HMDB0000167 | LCMS | + |
| Pyroglutamic Acid    | 130.1  | 84    | 100  | 20  | HMDB0000267 | LCMS | + |
| Leucine              | 132.1  | 86    | 60   | 16  | HMDB0000687 | LCMS | + |
| Asparagene           | 133.1  | 70.1  | 55   | 24  | HMDB0033780 | LCMS | + |
| Glutamic Acid        | 148.1  | 84.1  | 51   | 20  | HMDB0003339 | LCMS | + |
| Taurine              | 126    | 108   | 200  | 15  | HMDB0000251 | LCMS | + |
| Methionine           | 150.1  | 61    | 27   | 43  | HMDB0000696 | LCMS | + |
| Histidine            | 156.1  | 110   | 50   | 22  | HMDB0000177 | LCMS | + |
| Phenylalanine        | 166.1  | 120   | 50   | 18  | HMDB0000159 | LCMS | + |
| Tyrosine             | 182.1  | 136   | 40   | 17  | HMDB0000158 | LCMS | + |
| Lysine               | 147.1  | 84    | 38   | 22  | HMDB0000182 | LCMS | + |
| Trigonelline         | 138    | 92    | 60   | 27  | HMDB000875  | LCMS | + |
| CAMP                 | 328    | 134   | -87  | -32 | HMDB000058  | LCMS | - |
| GSH                  | 306    | 143.1 | -61  | -26 | HMDB000125  | LCMS | - |
| AMP                  | 346    | 134   | -82  | -40 | HMDB000045  | LCMS | - |
| NADH                 | 664    | 397   | -7   | -46 | HMDB01487   | LCMS | - |
| Creatinine           | 112    | 41    | -67  | -36 | HMDB000562  | LCMS | - |
| Kynurenine           | 207.1  | 144   | -58  | -33 | HMDB000684  | LCMS | - |
| Oxaloacetate         | 131    | 87    | -30  | -11 | HMDB000223  | LCMS | - |
| Glucose              | 179    | 89    | -50  | -15 | HMDB000122  | LCMS | - |
| GTP                  | 521.9  | 159   | -75  | -57 | HMDB01273   | LCMS | - |
| Hypoxanthine         | 135    | 65    | -108 | -37 | HMDB000157  | LCMS | - |

*Proline metabolism in RPE and retina*

|                         |       |       |      |     |             |      |   |
|-------------------------|-------|-------|------|-----|-------------|------|---|
| Phosphocreatinine       | 210   | 79    | -42  | -49 | HMDB0041624 | LCMS | - |
| Amino adipic Acid       | 160.1 | 116.1 | -47  | -20 | HMDB00510   | LCMS | - |
| Citrulline              | 174.1 | 131.1 | -32  | -20 | HMDB00904   | LCMS | - |
| Adenine                 | 134   | 107.1 | -92  | -25 | HMDB00034   | LCMS | - |
| Uracil                  | 111   | 42    | -51  | -37 | HMDB00300   | LCMS | - |
| Xanthine                | 151   | 108   | -70  | -23 | HMDB00292   | LCMS | - |
| Hippurate               | 178   | 77.1  | -61  | -23 | HMDB00714   | LCMS | - |
| Biotin                  | 243.1 | 200   | -85  | -23 | HMDB0000030 | LCMS | - |
| N Acetyl Glycine        | 116   | 74    | -37  | -14 | HMDB00532   | LCMS | - |
| Aconitate               | 173   | 85    | -37  | -18 | HMDB00072   | LCMS | - |
| Pentothenate            | 218.1 | 88.1  | -80  | -21 | HMDB00210   | LCMS | - |
| DHAP                    | 169   | 79    | -38  | -37 | HMDB01473   | LCMS | - |
| Urate                   | 167   | 124   | -86  | -19 | HMDB0000289 | LCMS | - |
| 4-Hydroxyphenylpyruvate | 179.1 | 97.1  | -40  | -17 | HMDB00707   | LCMS | - |
| Xanthosine              | 283.1 | 151   | -92  | -28 | HMDB00299   | LCMS | - |
| Citraconic Acid         | 129   | 85    | -21  | -12 | HMDB00634   | LCMS | - |
| Glutaric Acid           | 131   | 87    | -45  | -16 | HMDB00661   | LCMS | - |
| Guanosine               | 282.1 | 150   | -67  | -33 | HMDB00133   | LCMS | - |
| Xanthurenic Acid        | 204   | 160   | -67  | -19 | HMDB00881   | LCMS | - |
| Inosine                 | 267   | 135   | -123 | -30 | HMDB0000195 | LCMS | - |
| ADP                     | 426   | 79.1  | -65  | -84 | HMDB01341   | LCMS | - |
| GMP                     | 362.1 | 79    | -41  | -61 | HMDB01397   | LCMS | - |
| Heptadecanoic Acid      | 269.1 | 135.1 | -77  | -35 | HMDB02259   | LCMS | - |
| Methylmalonate          | 117   | 73    | -58  | -14 | HMDB00202   | LCMS | - |
| G6P                     | 259   | 79    | -46  | -62 | HMDB01401   | LCMS | - |
| IMP                     | 347   | 79    | -118 | -86 | HMDB00175   | LCMS | - |
| UDP                     | 403   | 79    | -30  | -73 | HMDB00295   | LCMS | - |
| Lactate                 | 89    | 43    | -60  | -17 | HMDB0000190 | LCMS | - |
| Oxalic Acid             | 89    | 61    | -45  | -10 | HMDB0002329 | LCMS | - |
| Succinate               | 117   | 73    | -54  | -16 | HMDB0000254 | LCMS | - |
| α-Ketoglutarate         | 145   | 101   | -56  | -11 | HMDB0000208 | LCMS | - |
| Malate                  | 133   | 115   | -50  | -14 | HMDB0031518 | LCMS | - |
| Phosphoenolpyruvic      | 167.1 | 79    | -38  | -20 | HMDB0000263 | LCMS | - |
| Pantothenic Acid        | 218.1 | 71    | -70  | -41 | HMDB0000210 | LCMS | - |
| Ribulose 5 Phosphate    | 229   | 79    | -70  | -45 | HMDB0000618 | LCMS | - |
| G3P                     | 169   | 79    | -74  | -28 | HMDB0000807 | LCMS | - |
| G1P                     | 259   | 79    | -85  | -60 | HMDB0001586 | LCMS | - |
| Carbamolyphosphate      | 151   | 108   | -105 | -25 | HMDB0001096 | LCMS | - |
| Myo Inositol            | 179   | 87    | -105 | -24 | HMDB0000211 | LCMS | - |
| Hypotaurine             | 108.1 | 64    | -40  | -17 | HMDB0000965 | LCMS | - |

*Proline metabolism in RPE and retina*

|                                 |     |    |     |     |             |      |   |
|---------------------------------|-----|----|-----|-----|-------------|------|---|
| Nicotinic Acid 13C1<br>Negative | 123 | 78 | -50 | -15 | N/A         | LCMS | - |
| 2-hydroxyglutarate              | 433 | NA | NA  | NA  | HMDB0059655 | GCMS | + |
| 3PG                             | 585 | NA | NA  | NA  | HMDB0000807 | GCMS | + |
| 4-hydroxyproline                | 314 | NA | NA  | NA  | HMDB00725   | GCMS | + |
| a-ketoglutarate                 | 346 | NA | NA  | NA  | HMDB0000208 | GCMS | + |
| Alanine                         | 158 | NA | NA  | NA  | HMDB0000161 | GCMS | + |
| Asparagine                      | 417 | NA | NA  | NA  | HMDB0000168 | GCMS | + |
| Aspartate                       | 418 | NA | NA  | NA  | HMDB0000191 | GCMS | + |
| Citrate                         | 459 | NA | NA  | NA  | HMDB0000094 | GCMS | + |
| Cysteine                        | 304 | NA | NA  | NA  | HMDB0000574 | GCMS | + |
| Fumarate                        | 287 | NA | NA  | NA  | HMDB0000134 | GCMS | + |
| Glutamate                       | 432 | NA | NA  | NA  | HMDB0003339 | GCMS | + |
| Glutamine                       | 431 | NA | NA  | NA  | HMDB00641   | GCMS | + |
| Glycine                         | 218 | NA | NA  | NA  | HMDB0000123 | GCMS | + |
| Isocitrate                      | 591 | NA | NA  | NA  | HMDB0000193 | GCMS | + |
| Isoleucine                      | 200 | NA | NA  | NA  | HMDB0000172 | GCMS | + |
| Lactate                         | 261 | NA | NA  | NA  | HMDB0000190 | GCMS | + |
| Leucine                         | 200 | NA | NA  | NA  | HMDB0000687 | GCMS | + |
| Lysine                          | 300 | NA | NA  | NA  | HMDB0000182 | GCMS | + |
| Malate                          | 419 | NA | NA  | NA  | HMDB0031518 | GCMS | + |
| Methionine                      | 218 | NA | NA  | NA  | HMDB0000696 | GCMS | + |
| Myristic acid-D27               | 312 | NA | NA  | NA  | N/A         | GCMS | + |
| Ornithine                       | 417 | NA | NA  | NA  | HMDB0000214 | GCMS | + |
| Phosphoenolpyruvate             | 453 | NA | NA  | NA  | HMDB0000263 | GCMS | + |
| Phenylalanine                   | 302 | NA | NA  | NA  | HMDB0000159 | GCMS | + |
| Proline                         | 184 | NA | NA  | NA  | HMDB00162   | GCMS | + |
| 5-oxoproline                    | 300 | NA | NA  | NA  | HMDB0000267 | GCMS | + |
| Pyruvate                        | 174 | NA | NA  | NA  | HMDB0000243 | GCMS | + |
| Serine                          | 390 | NA | NA  | NA  | HMDB0000187 | GCMS | + |
| Succinate                       | 289 | NA | NA  | NA  | HMDB0000254 | GCMS | + |
| Taurine                         | 296 | NA | NA  | NA  | HMDB0000251 | GCMS | + |
| Threonine                       | 404 | NA | NA  | NA  | HMDB0000167 | GCMS | + |
| Tryptophan                      | 244 | NA | NA  | NA  | HMDB00929   | GCMS | + |
| Tyrosine                        | 302 | NA | NA  | NA  | HMDB0000158 | GCMS | + |
| Uracil                          | 283 | NA | NA  | NA  | HMDB00300   | GCMS | + |
| Urate                           | 567 | NA | NA  | NA  | HMDB0000289 | GCMS | + |
| Urea                            | 231 | NA | NA  | NA  | HMDB0000294 | GCMS | + |
| Valine                          | 186 | NA | NA  | NA  | HMDB0000883 | GCMS | + |
| Xanthine                        | 437 | NA | NA  | NA  | HMDB00292   | GCMS | + |

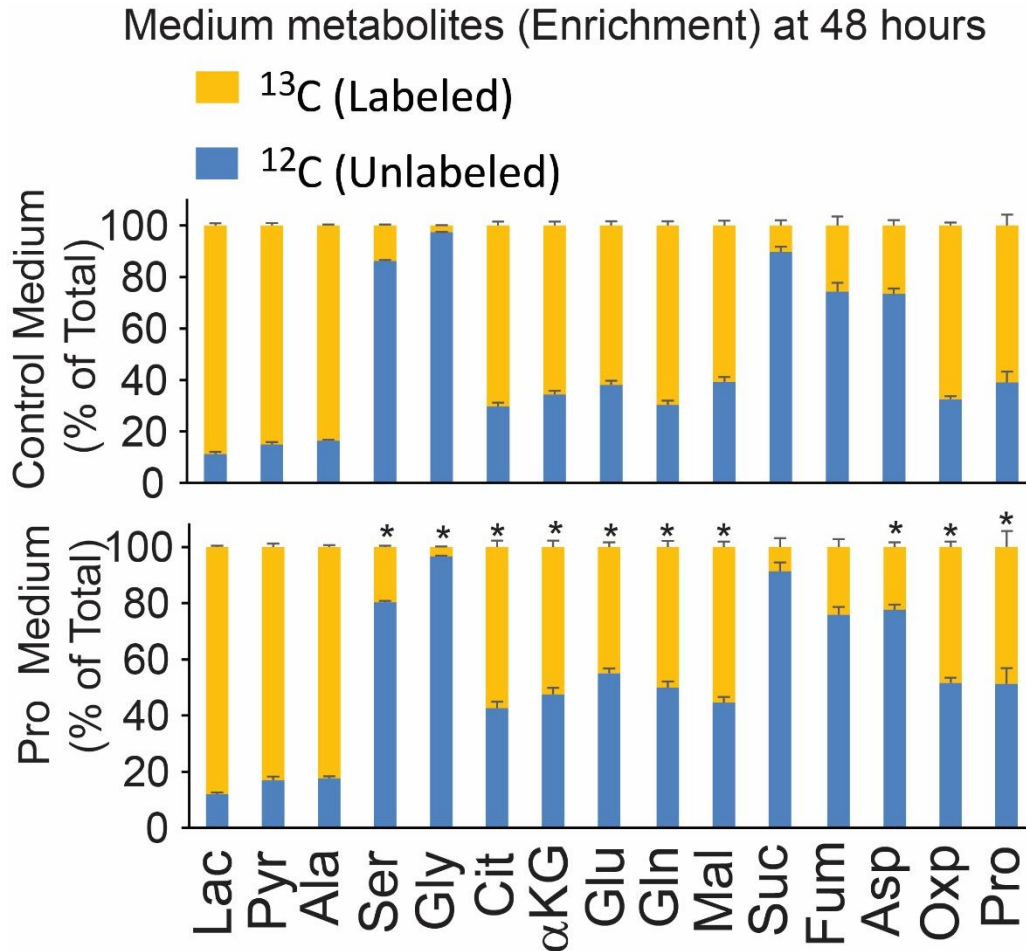

**Fig S3. Proline regulates glucose metabolism and stimulates synthesis of serine and glycine in media.** After cultured for 48 hrs in  $^{13}\text{C}$  glucose with or without 1mM proline, medium metabolites were analyzed by GC MS. N=4. \*P <0.05 vs Con without proline or Con at 48 hrs. Top panel was control and bottom panel was the medium with proline. N=4. \*P<0.05 vs Con at 48 hrs. Lac, lactate; Pyr, pyruvate; Mal, malate; Suc, succinate; Fum, fumarate; Oxp, 5-oxoproline.



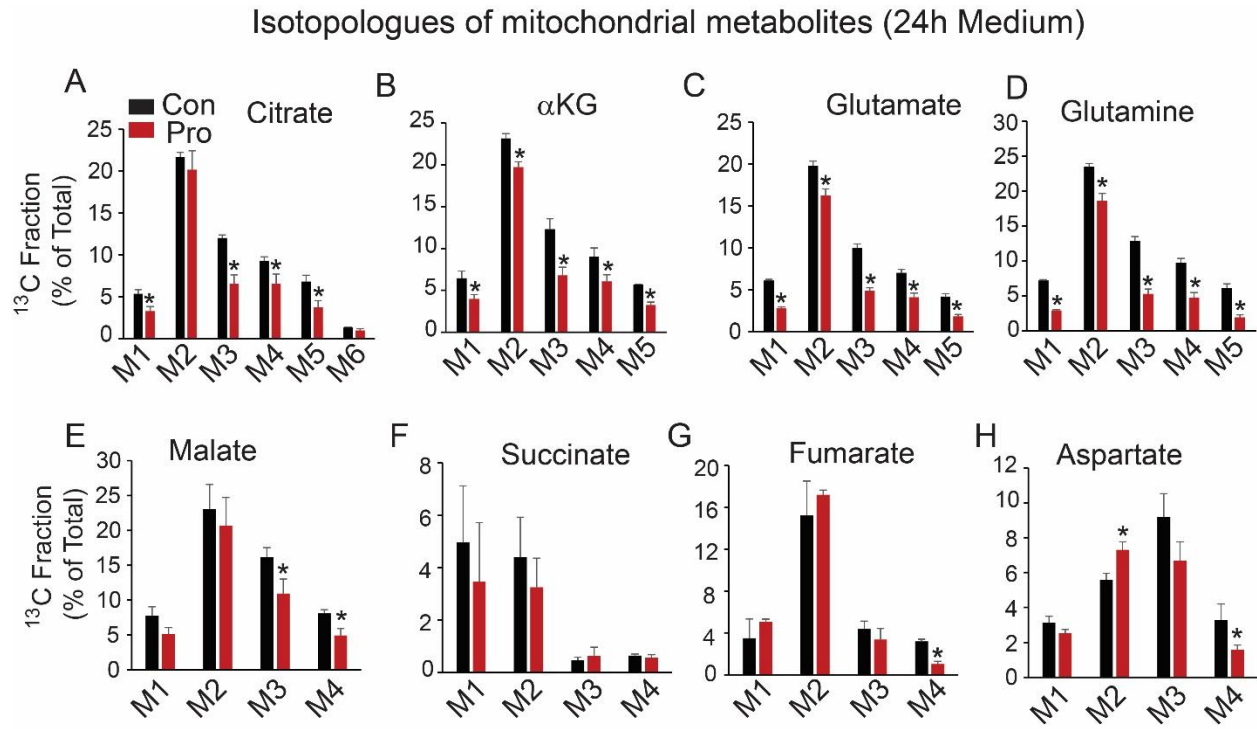

**Fig S4. The labeling pattern of mitochondrial metabolites in media.** (A-H) RPE cells were incubated in 5 mM  $^{13}\text{C}$  glucose with or without 1 mM proline for 24 hrs. Culture media were analyzed by GC MS. N=4. \*P<0.05 vs Con without proline.

Isotopologues of mitochondrial metabolites (RPE cellular metabolites)

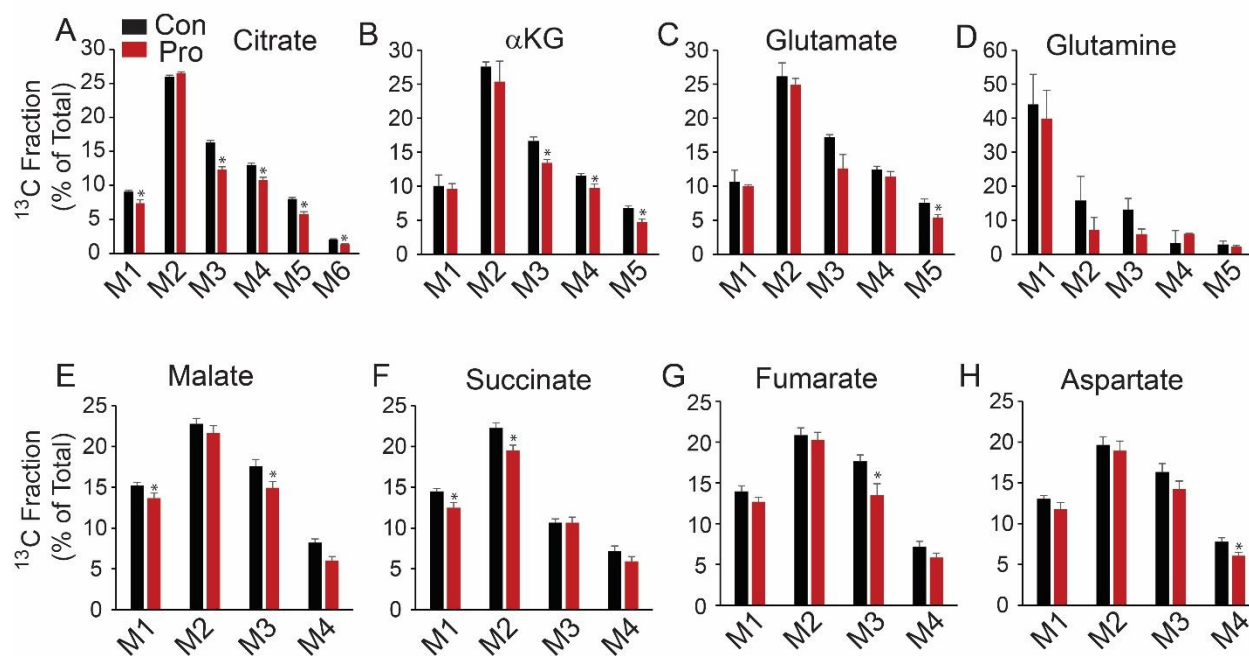

**Fig S5. The labeling pattern of mitochondrial metabolites in RPE cells.** (A-H) RPE cells were incubated in 5 mM <sup>13</sup>C glucose with or without 1 mM proline for 48 hrs. Culture media were analyzed by GC MS. N=4. \*P<0.05 vs Con without proline.

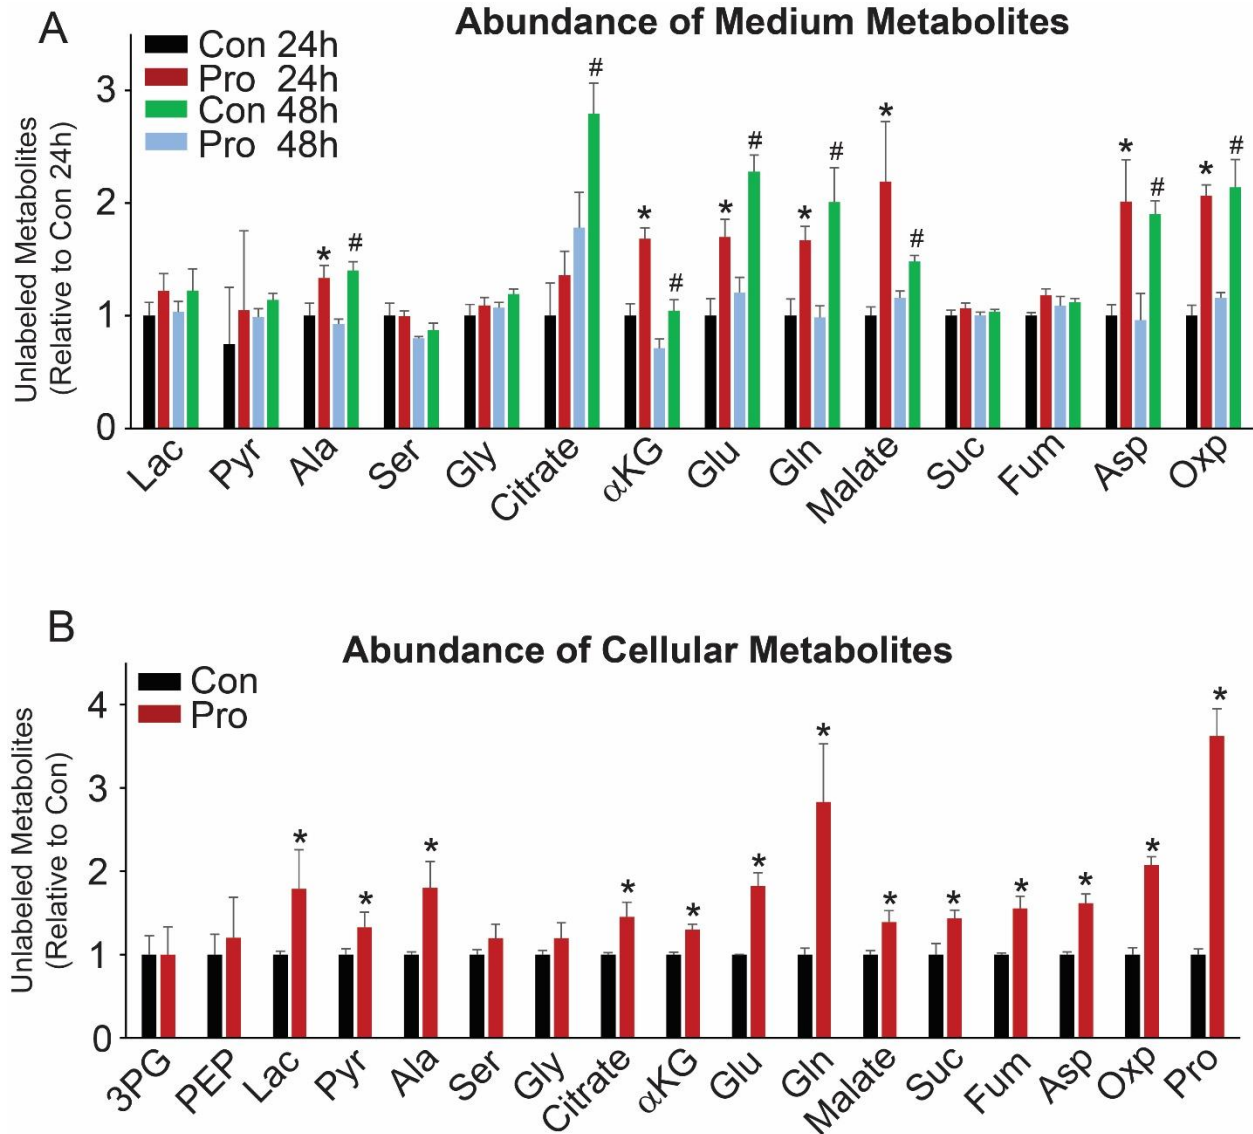

**Fig S6 Proline increases glycolysis and mitochondrial intermediates.** (A-B) Changes of unlabeled metabolites from proline in medium (A) and RPE cells (B), after cultured in  $^{13}\text{C}$  glucose at 24 hr or 48 hrs. Cell metabolites were collected after 48 hrs. \* $P < 0.05$  vs Con medium at 24 hr or Con cells at 48 hrs. # $P < 0.05$  vs Con medium at 48 hrs. Lac, Lactate, Pyr, pyruvate; Suc, succinate; Fum, fumarate; Asp, aspartate; Oxp, 5-oxoproline.

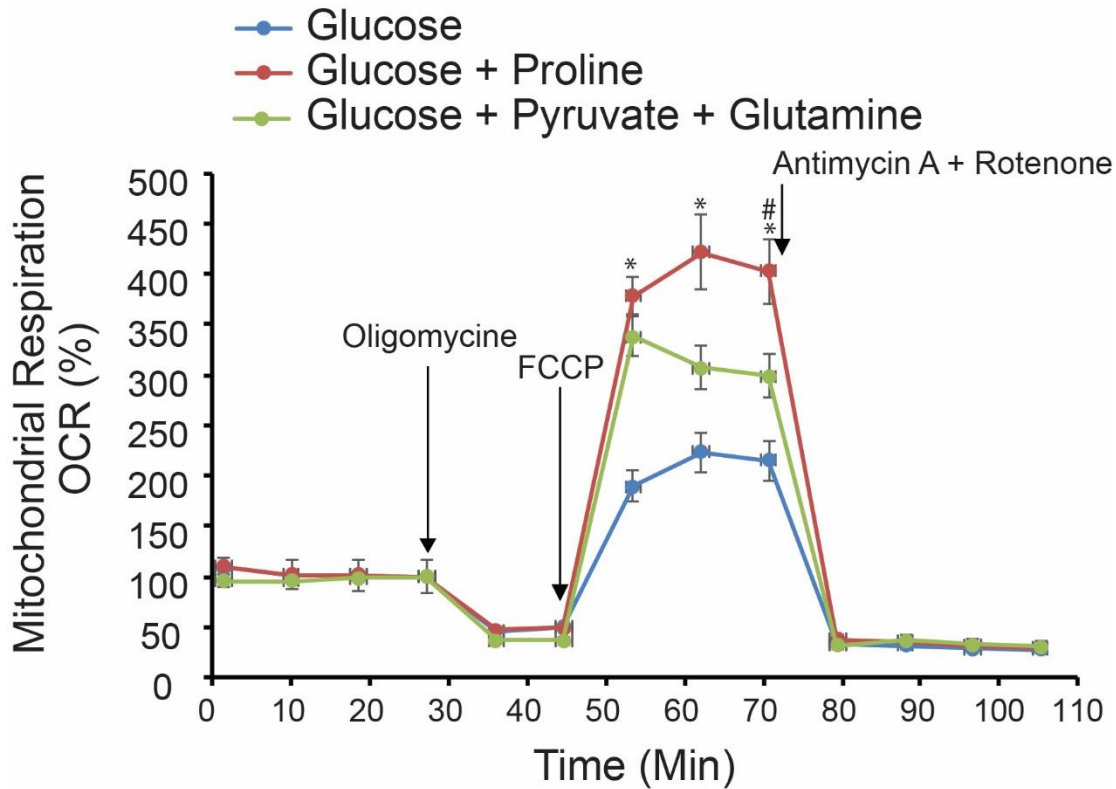

**Fig S7. Proline increases mitochondrial oxygen consumption.** RPE cells were incubated with different nutrients in DMEM (5 mM glucose; 5 mM glucose + 2 mM proline; 5 mM glucose + 1 mM pyruvate + 2 mM glutamine). Oxygen consumption was measured by Seahorse XF24 analyzer. \* $P < 0.05$  vs glucose alone and # $P < 0.05$  vs glucose + pyruvate + glutamine. OCR, oxygen consumption.

**Table S2. Formula for high-proline diet and regular amino acid diet.**

|                                              | Amino Acid (AA)<br>Diet) g/Kg | High-Proline Diet<br>g/KG |
|----------------------------------------------|-------------------------------|---------------------------|
| L-Alanine                                    | 3.5                           | 2.9805                    |
| L-Arginine HCL                               | 12.1                          | 12.1                      |
| L-Asparagine                                 | 6                             | 2.8                       |
| L-Aspartic Acid                              | 3.5                           | 4.0254                    |
| L-Cystine                                    | 3.5                           | 3.5                       |
| L-Glutamic Acid                              | 40                            | 32.8645                   |
| Glycine                                      | 23.3                          | 19.66                     |
| L-Histidine HCL, monohydrate                 | 4.5                           | 4.5                       |
| L-Isoleucine                                 | 8.2                           | 8.2                       |
| L-Leucine                                    | 11.1                          | 11.1                      |
| L-Lysine HCL                                 | 18                            | 18                        |
| L-Methionine                                 | 8.2                           | 8.2                       |
| L-Phenylalanine                              | 7.5                           | 7.5                       |
| L-Proline                                    | 3.5                           | 20                        |
| L-Serine                                     | 3.5                           | 3.9146                    |
| L-Threonine                                  | 8.2                           | 8.2                       |
| L-Tryptophan                                 | 1.8                           | 1.8                       |
| L-Tyrosine                                   | 5                             | 5                         |
| L-Valine                                     | 8.2                           | 8.2                       |
| Sucrose                                      | 344.98                        | 341.935                   |
| Corn Starch                                  | 150                           | 150                       |
| Maltodextrin                                 | 150                           | 150                       |
| Soybean Oil                                  | 80                            | 80                        |
| Cellulose                                    | 30                            | 30                        |
| Mineral Mix, AIN-93M-MX<br>(94049)           | 35                            | 35                        |
| Calcium Phosphate, monobasic,<br>monohydrate | 8.2                           | 8.2                       |
| Vitamin Mix, AIN-93-VX (94047)               | 19.5                          | 19.5                      |
| Choline Bitartrate                           | 2.7                           | 2.7                       |
| TBHQ, antioxidant                            | 0.02                          | 0.02                      |
|                                              |                               |                           |
| Orange Food Color                            |                               | 0.1                       |
|                                              |                               |                           |
| <b>Amino Acid (AA) Diet (#TD.01084)</b>      |                               |                           |
| Nutrient Information                         |                               |                           |
|                                              | % By Weight                   | %kcal from                |
| Protein                                      | 15.4                          | 15.6                      |

*Proline metabolism in RPE and retina*

|                                            |             |            |
|--------------------------------------------|-------------|------------|
| CHO                                        | 64.9        | 66         |
| Fat                                        | 8           | 18.3       |
| Kcal/g                                     | 3.9         |            |
|                                            |             |            |
|                                            |             |            |
|                                            |             |            |
|                                            |             |            |
| <b>High-Proline Diet (#TD.170647) g/KG</b> |             |            |
| Nutrient Information                       |             |            |
|                                            | % By Weight | %kcal from |
| Protein                                    | 15.4        | 15.7       |
| CHO                                        | 64.6        | 65.9       |
| Fat                                        | 8           | 18.4       |
| Kcal/g                                     | 3.9         |            |

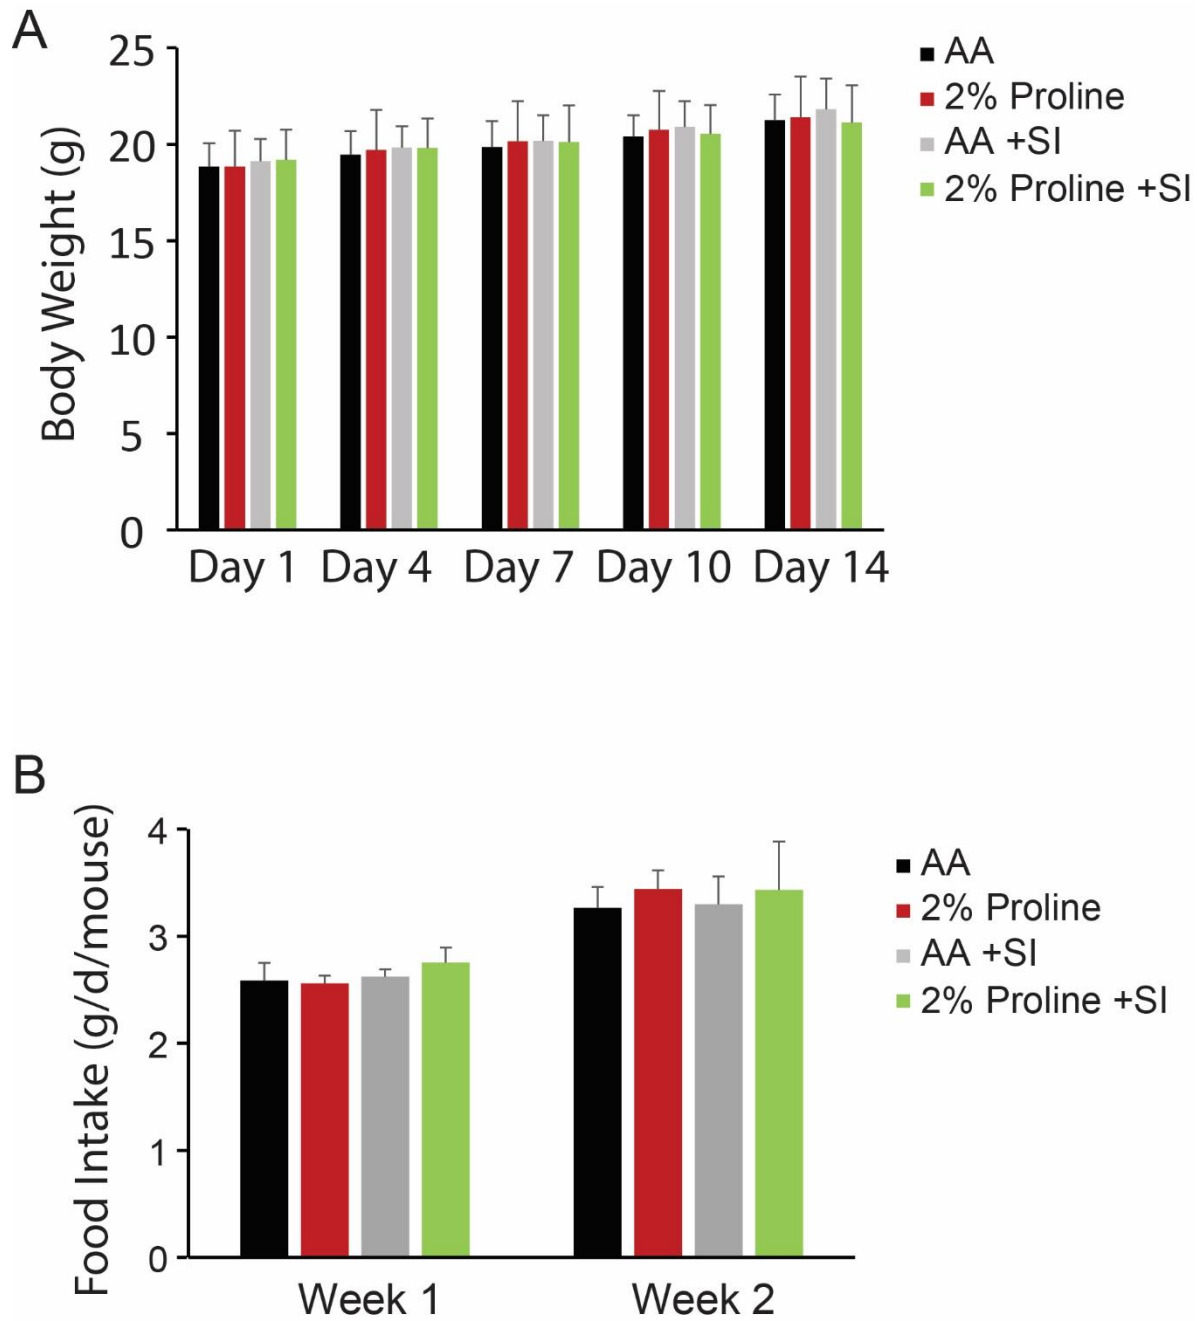

**Fig S8. High-proline did not alter mouse body weight and food intake.** (A) Body weight at different days with AA diet or high-proline diet. N=10. (B) Food intake was measured weekly. N=10. No significance difference in body weight and food intake among different groups (ANOVA).

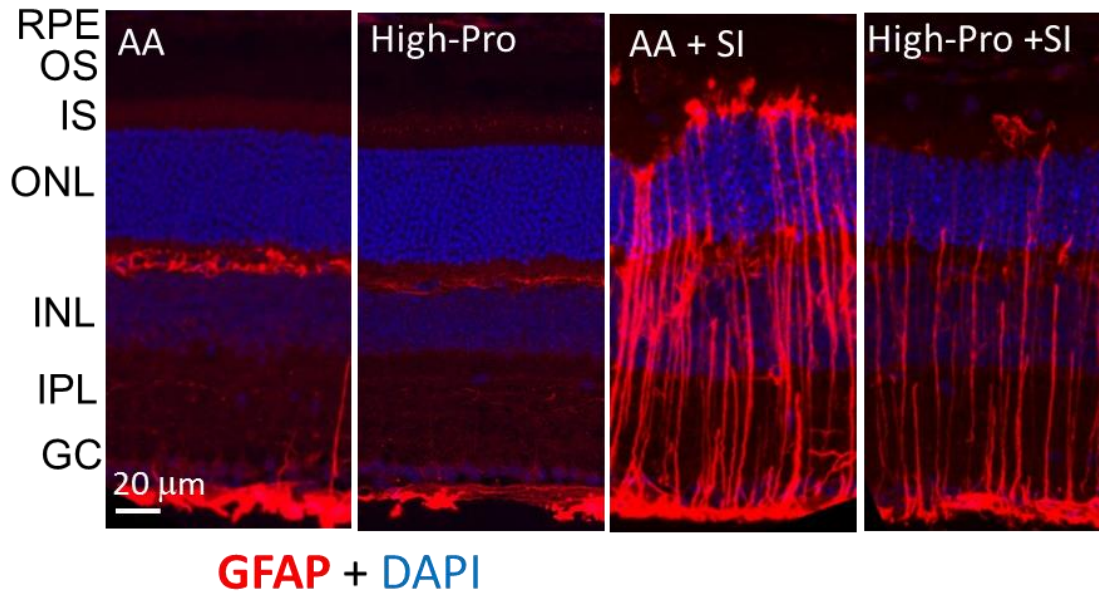

**Fig S9. High-proline reduced the activation of Müller glial cells.** Three days after injection with sodium iodate (SI), mouse eyes were fixed, sectioned and stained with antibody against glial fibrillary acidic protein (GFAP) antibody and counterstained with DAPI. N=3 for each group.

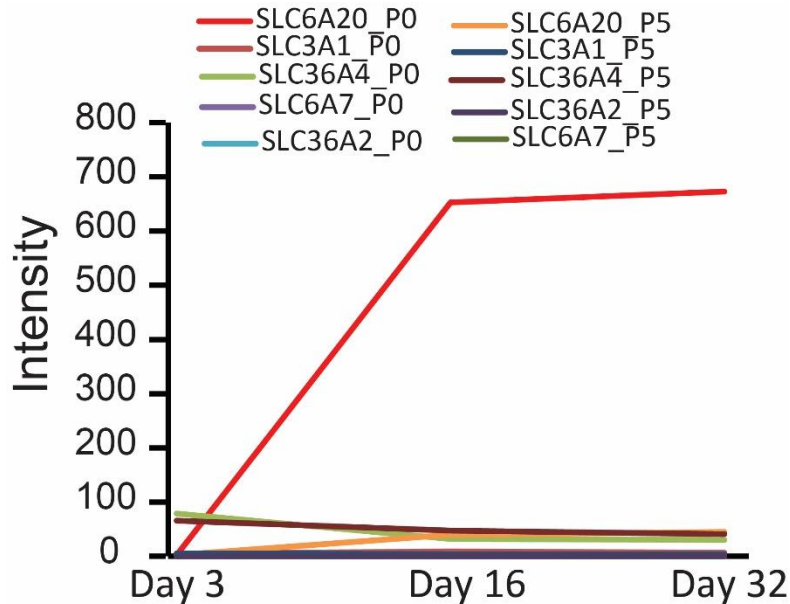

**Fig S10. Expression of proline transporters in RPE maturation and differentiation.** Transcriptional data were analyzed from published database. Early human RPE passage (P0) and late passage (P5) were cultured for different periods. After 32 days, P0 cells have typical RPE morphology but P5 cells lost the morphology due to dedifferentiation. Cells at different days were harvested for transcriptional study.



**Table S3. The reagents and key resources.**

| <b>Reagent or Media components</b>                                 | <b>SOURCE</b>                  | <b>IDENTIFIER</b> |
|--------------------------------------------------------------------|--------------------------------|-------------------|
| U- <sup>13</sup> C proline                                         | Sigma-Aldrich                  | 604801-CONF       |
| U- <sup>13</sup> C Glucose                                         | Cambridge-Isotope Laboratories | CLM-1396          |
| L-Proline                                                          | Sigma-Aldrich                  | 81709             |
| Tetrahydro-2-furoic acid                                           | Sigma-Aldrich                  | 605166            |
| Canaline                                                           | Cayman Chemical company        | 9002357           |
| Halofuginone                                                       | Cayman Chemical company        | 13370             |
| 1,4-dihydrophenonhthrolin-4-one-3-Carboxylic acid                  | Cayman Chemical company        | 71220             |
| MEM a                                                              | Fisher                         | 12561056          |
| Non-essential amino acids                                          | Life Technologies (Invitrogen) | 1140-050          |
| N1 medium supplement                                               | Sigma-Aldrich                  | N6530-5mL         |
| FBS                                                                | Atlanta Biologicals            | S11550            |
| Taurine                                                            | Sigma-Aldrich                  | T0625-10G         |
| Hydrocortisone-water soluble bioreagent, suitable for cell culture | Sigma-Aldrich                  | H0396-100MG       |
| 3, 3', 5-Triiodo-L-Thyronine                                       | Sigma-Aldrich                  | T6397-100MG       |
| Penicillin-Streptomycin (5,000 U/mL)                               | Life Technologies (Invitrogen) | 15070-063         |
| DMEM                                                               | Fisher                         | 10566016          |
| DMEM Nutrient Mix F12 500mL                                        | Fisher                         | 11320033          |
| Rock Inhibitor ( Y-27632 dihydrochloride)                          | Tocris/R&D Systems             | 1254              |
| HBSS                                                               | Fisher                         | 14170112          |
| Sodium iodate                                                      | Sigma-Aldrich                  | S4007             |
|                                                                    |                                |                   |
|                                                                    |                                |                   |
| <b>Cytotoxicity experiments</b>                                    |                                |                   |
| Clear DMEM (Gibco/Life Technologies)                               | ThermoFisher                   | A14430-01         |
| H202 (30% w/w)                                                     | Sigma                          | H-1009            |
| Pierce LDH cytotoxicity assay kit                                  | ThermoFisher                   | 88953             |
| Lactate Dehydrogenase-SL (kit)                                     | Genzyme Diagnostics            | 327-30            |
|                                                                    |                                |                   |
|                                                                    |                                |                   |
| <b>Cell lines</b>                                                  |                                |                   |
| A-RPE19 cells                                                      | ATCC                           | CRL-2302™         |

*Proline metabolism in RPE and retina*

|                                                                    |                                 |               |
|--------------------------------------------------------------------|---------------------------------|---------------|
| hRPE-1 cells                                                       | ATCC                            | CRL-4000™     |
| HEK 293 T cells                                                    | Gift from Dr. Alexy Ivanov      |               |
|                                                                    |                                 |               |
| <b>ERG</b>                                                         |                                 |               |
| GenTeal Tears, Severe Lubricant Eye Gel                            | NDC                             | 0078-0429-47  |
| Systane Ultra, High Percentage Lubricant Eye Drops                 | NDC                             | 00065-1431-28 |
| Paragon Phenylephrine Hydrochloride Hydrochloride, USP 2.5%        | NDC                             | 42702-102-15  |
| Sandoz Tropicamide 1%                                              | NDC                             | 61314-355-02  |
|                                                                    |                                 |               |
| <b>Mass Spectrometry (LC MS and GC MS)</b>                         |                                 |               |
| Acquity UPLC BEH Amide 1.7 µm Vanguard pre-column 2.1 x 5mm column | Waters                          | 186004799     |
| Acquity UPLC BEH Amide 1.7 µm 2.1 x 50mm column                    | Waters                          | 186004800     |
| Water, Optima™ LC/MS Grade                                         | Fisher Chemical                 | 7732-18-5     |
| Acetonitrile, Optima™ LC/MS Grade                                  | Fisher Chemical                 | 75-05-8       |
| Ammonium Acetate                                                   | Sigma-Aldrich                   | 431311        |
| Ammonium hydroxide 28 - 30% in water ACS                           | VWR                             | AC42330-5000  |
| Methoxyamine hydrochloride                                         | Sigma-Aldrich                   | 226904        |
| Pyridine                                                           | Sigma-Aldrich                   | 270970        |
| N-tert-Butyldimethylsilyl-N-methyltrifluoroacetamide               | Sigma-Aldrich                   | 394882        |
| DB-5ms GC Column, 30 m, 0.25 mm, 0.25 µm,                          | Agilent Technologies            | 122-5532      |
|                                                                    |                                 |               |
| <b>Animals</b>                                                     |                                 |               |
| C57 B6/J                                                           | Jackson Lab                     | 664           |
|                                                                    |                                 |               |
| <b>Flat mount staining</b>                                         |                                 |               |
| paraformaldehyde                                                   | Electron Microscopy Sciences    | 15710         |
| Triton X-100                                                       | LabChem                         | LC262801      |
| PBS                                                                | Research products international | 33668-33747   |
| PNA                                                                | Vector                          | ZC0606        |
| ZO-1                                                               | ivitrogen                       | 61-7300       |
| flouromount                                                        | SouthernBiotech                 | 0100-01       |
| Alexa Fluor 568 donkey anti-rabbit IgG                             | invitrogen                      | 1826664       |
